# Supplementary material for: Social Disparities in Exposure to Point-of-Sale Cigarette Marketing
Source: MDPI journal article supplement (doi:10.3390/ijerph13121263), 2016-12-21
Supplement: s1 [file s1]

# Supplementary Materials: Social Disparities in Exposure to Point-of-Sale Cigarette Marketing

Mohammad Siahpush, Paraskevi A. Farazi, Jungyoon Kim, Tzeyu L. Michaud, Aaron M. Yoder, Ghada Soliman, Melissa K. Tibbits, Minh N. Nguyen and Raees A. Shaikh

**Table S1.** Odds ratios (OR) and 95% confidence intervals (CI) from ordered logistic regression of point-of-sale (POS) cigarette marketing on area-level sociodemographic factors.

| Variables                                    | Adjusted <sup>a</sup> OR (95% CI) | <i>p</i> -Value |
|----------------------------------------------|-----------------------------------|-----------------|
| Median household income                      | 1.00 (1.00–1.00)                  | 0.893           |
| Poverty rate                                 | 1.00 (0.99–1.01)                  | 0.868           |
| Percent with less than high school education | 1.00 (0.99–1.02)                  | 0.445           |
| Percent non-white                            | 1.00 (1.00–1.01)                  | 0.115           |

<sup>a</sup> Adjusted for the effect of individual-level variables including income, education, race/ethnicity, sex, age, frequency of visits to stores, and method of recruitment.

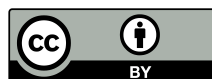

© 2016 by the authors. Submitted for possible open access publication under the terms and conditions of the Creative Commons Attribution (CC-BY) license (<http://creativecommons.org/licenses/by/4.0/>).
